# Supplementary material
Source: Royal Society of Chemistry journal article supplement (doi:10.1039/d6ta01747a)
Supplement: d6ta01747a1.pdf [file d6ta01747a1.pdf]

## Supporting Information

### **3D dual network MOF-derived magnetic Co/Ni@C-GnP@PDMS composites for absorption-dominant EMI shielding with enhanced thermal conductivity**

Tahreem Zahra<sup>a</sup>, Muhammad Yasir<sup>a,b</sup>, Sebastian Anand<sup>c</sup>, Kayeon Kang<sup>a</sup>, Sung-Ryong  
Kim<sup>a,b\*</sup>

*<sup>a</sup>Department of Polymer Science and Engineering, Korea National University, Chungju 27469,  
Republic of Korea*

*<sup>b</sup>Department of IT - Energy Convergence (BK21 PLUS), Korea National University, Chungju  
27469, Republic of Korea*

*<sup>c</sup>School of Chemistry and CRANN Institute, Trinity College Dublin, Dublin 2, Ireland*

**\*Corresponding author:** Sung-Ryong Kim, e-mail: [srkim@ut.ac.kr](mailto:srkim@ut.ac.kr)

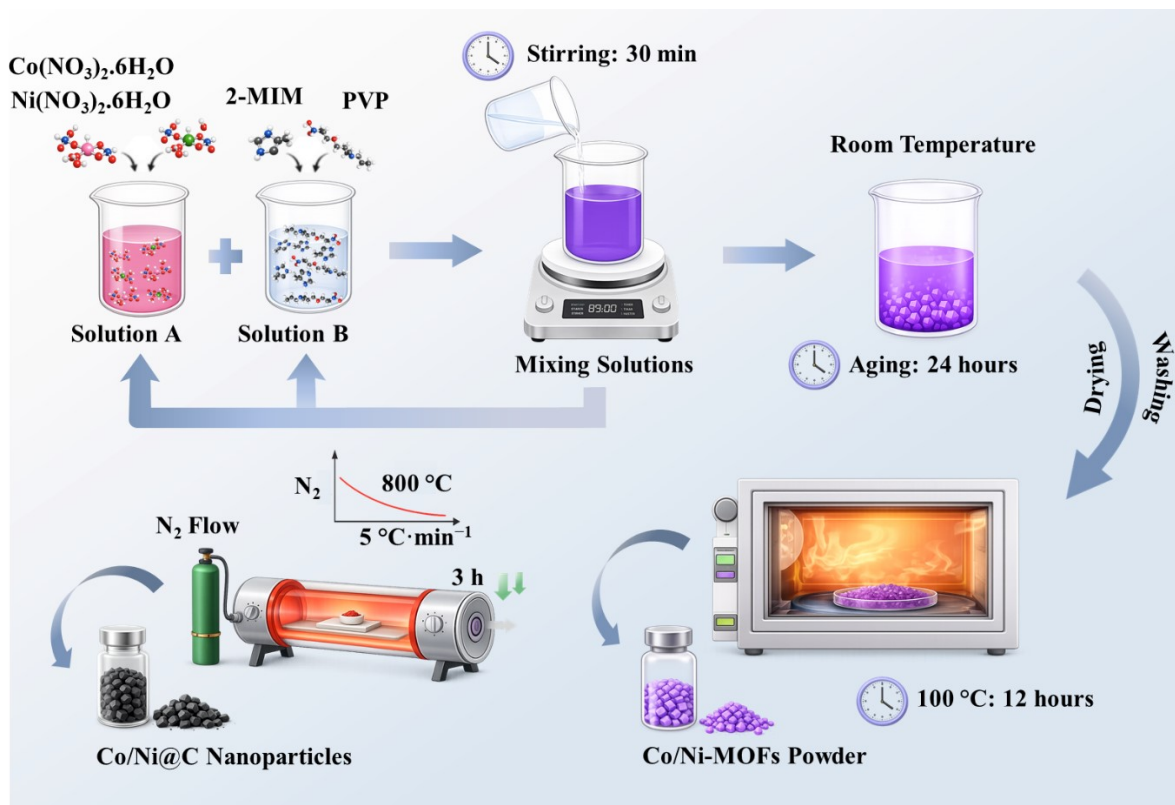

**Fig. S1.** Schematic representation of the preparation of Co/Ni-MOFs and Co/Ni@C carbonized magnetic nanoparticles.

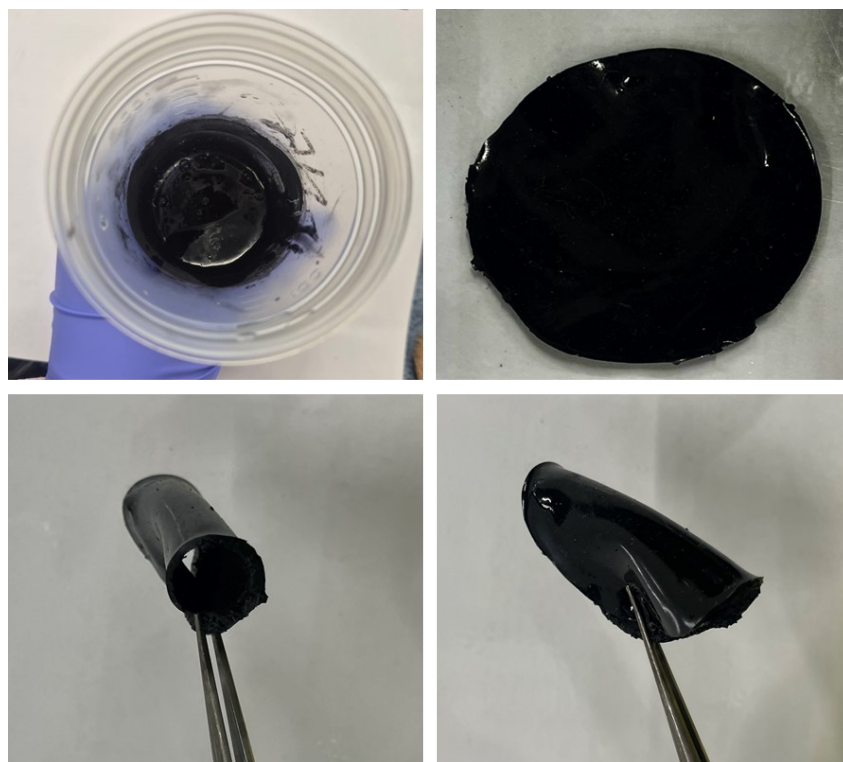

**Fig. S2.** Digital photographs of as-prepared Co/Ni@C@PDMS mixture and the corresponding cured Co/Ni@C@PDMS composite film.

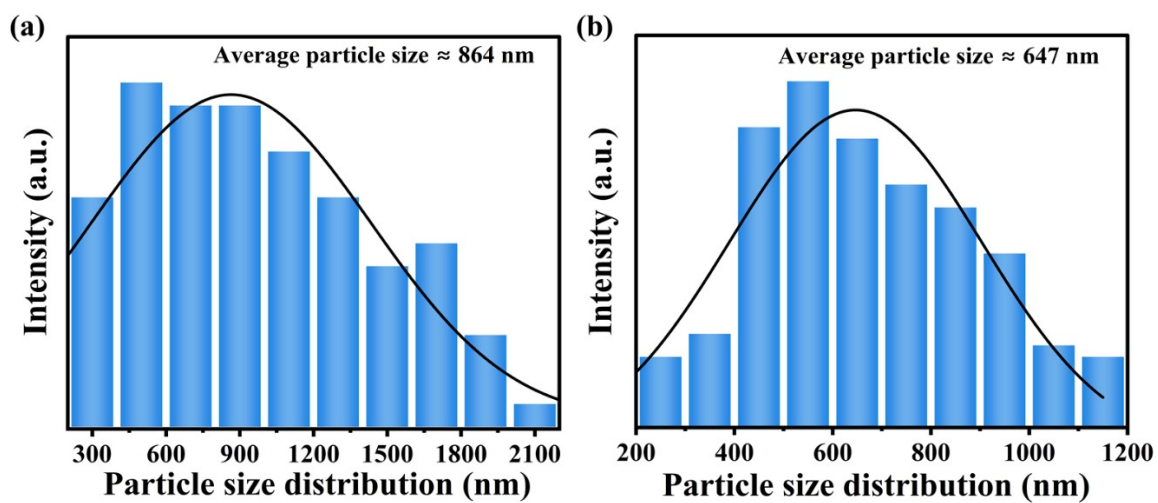

**Fig. S3.** Particle size distribution of (a) Pristine Co/Ni-MOFs before carbonization. (b) Co/Ni@C nanoparticles obtained after carbonization.

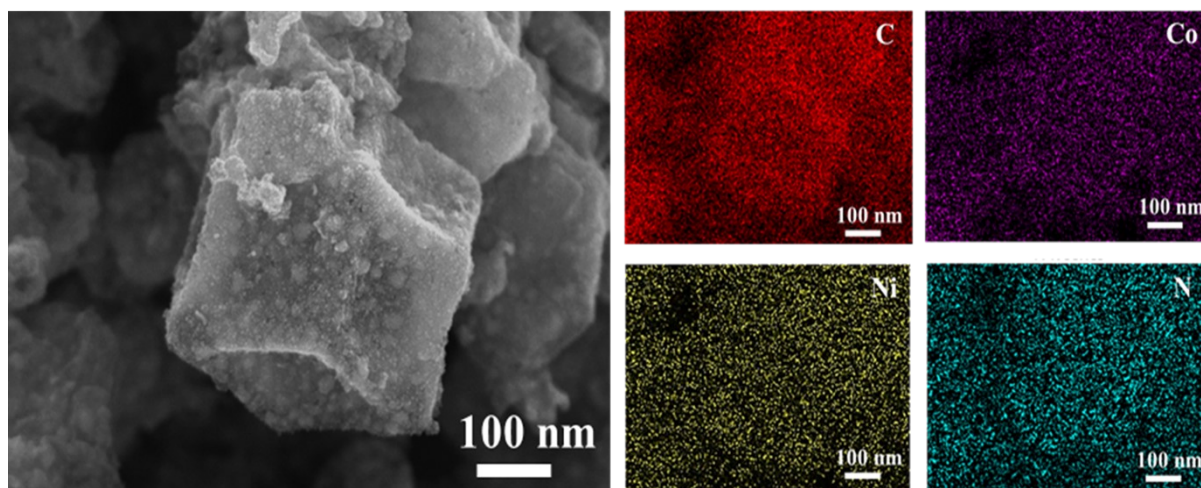

**Fig. S4.** EDS elemental mapping images showing the spatial distribution of C, Co, Ni and N elements in the Co/Ni@C nanoparticles.

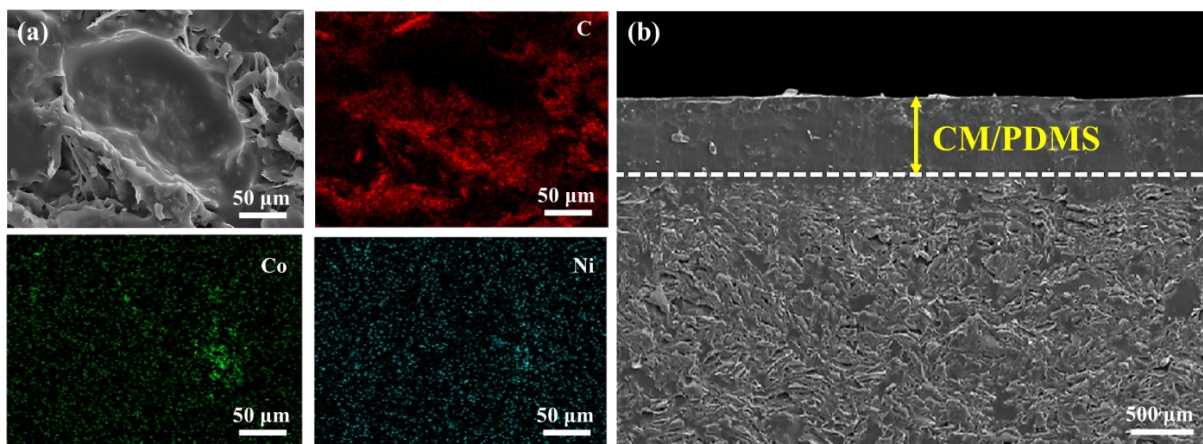

**Fig. S5.** (a) EDS elemental mapping images of C, Co, and Ni elements in the 3D dual GnP30@PDMS/CM5 composites. (b) Cross-sectional SEM image showing the CM/PDMS layer on the top side of the GnP30@PDMS/CM5 composites.

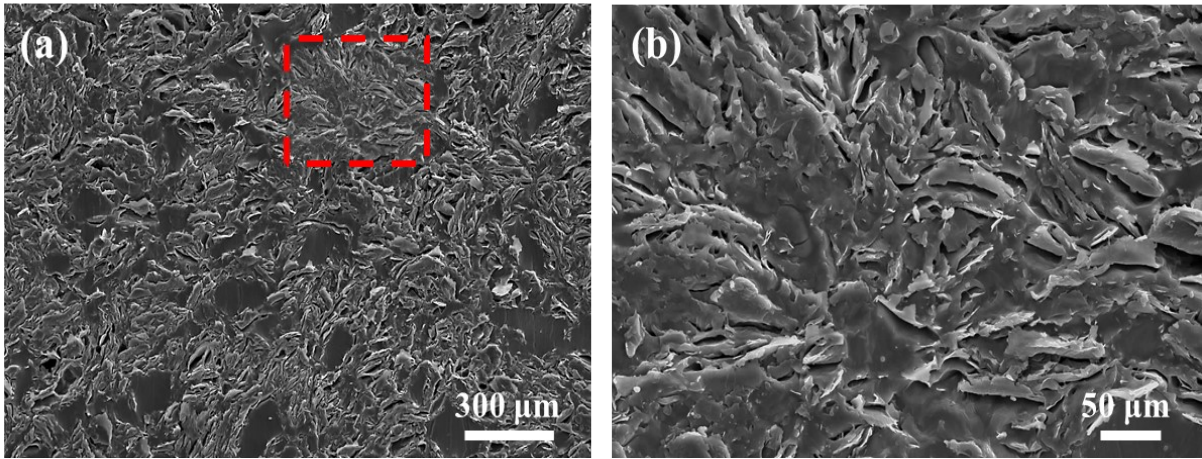

**Fig. S6.** Cross-sectional SEM images of random R-GnP30/CM5/PDMS composites at different magnifications.

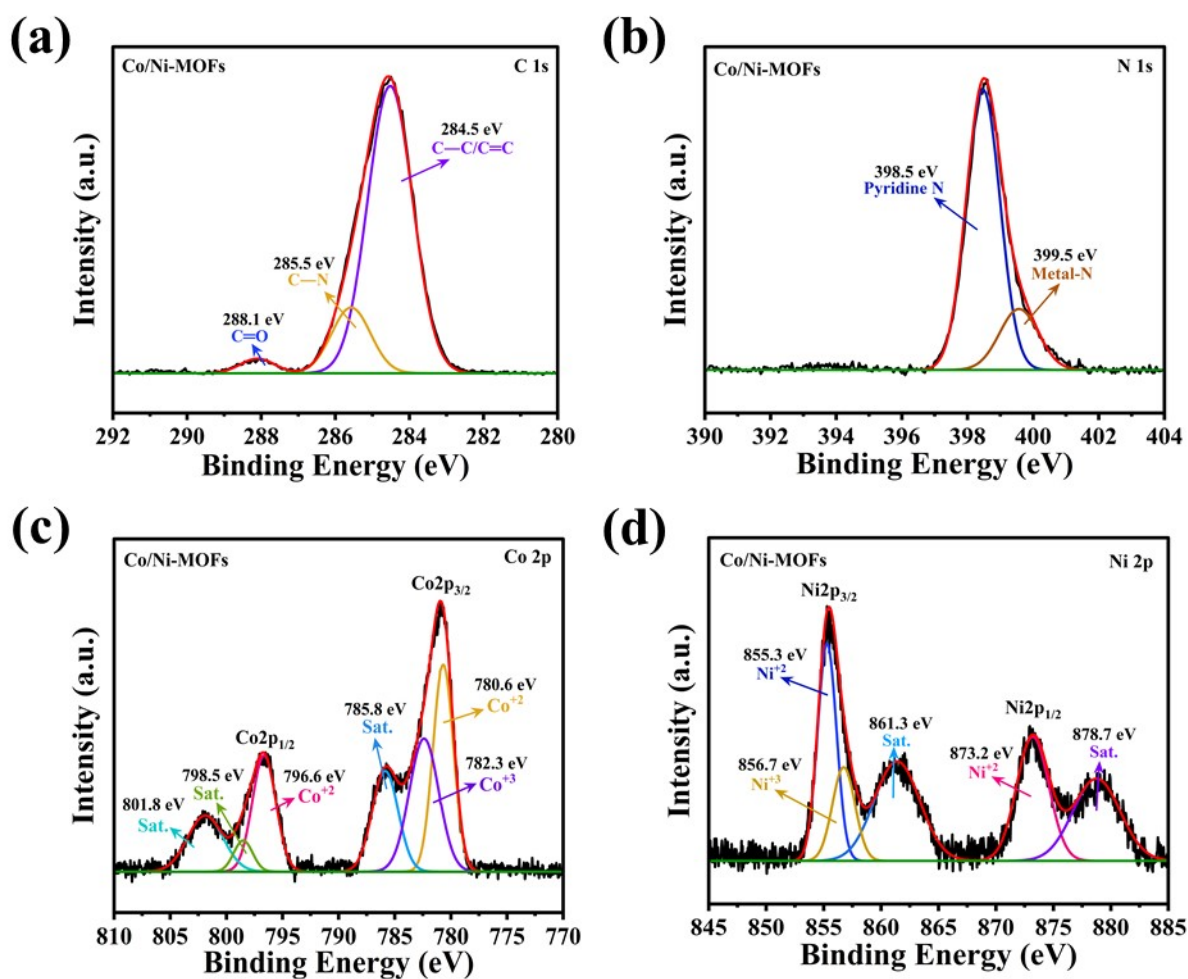

**Fig. S7.** High resolution XPS spectrum of (a) C 1s spectrum, (b) N 1s spectrum, (c) Co 2p spectrum, and (d) Ni 2p spectrum for Co/Ni-MOFs.

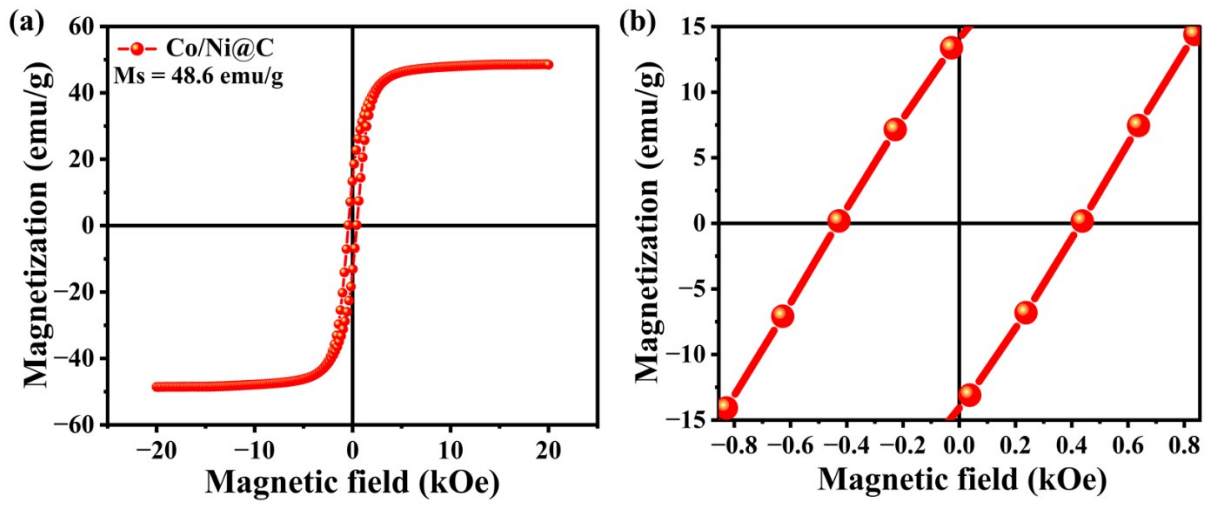

Fig. S8. (a-b) M-H hysteresis loops of carbonized Co/Ni@C nanoparticles.

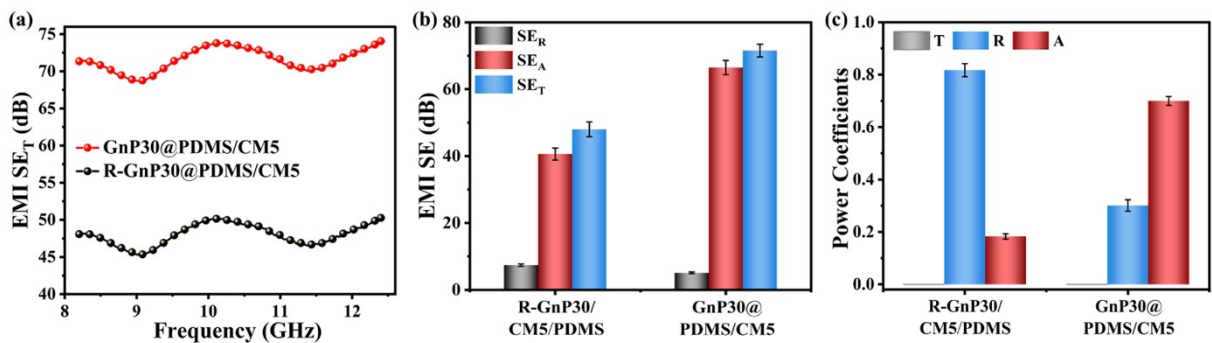

Fig. S9. Comparison of (a) EMI  $SE_T$ , (b) SE, and (c) corresponding power coefficients of

random R-GnP30/CM5/PDMS and 3D dual GnP30@PDMS/CM5 composites. Error bars represent standard deviation ( $n = 3$ ).

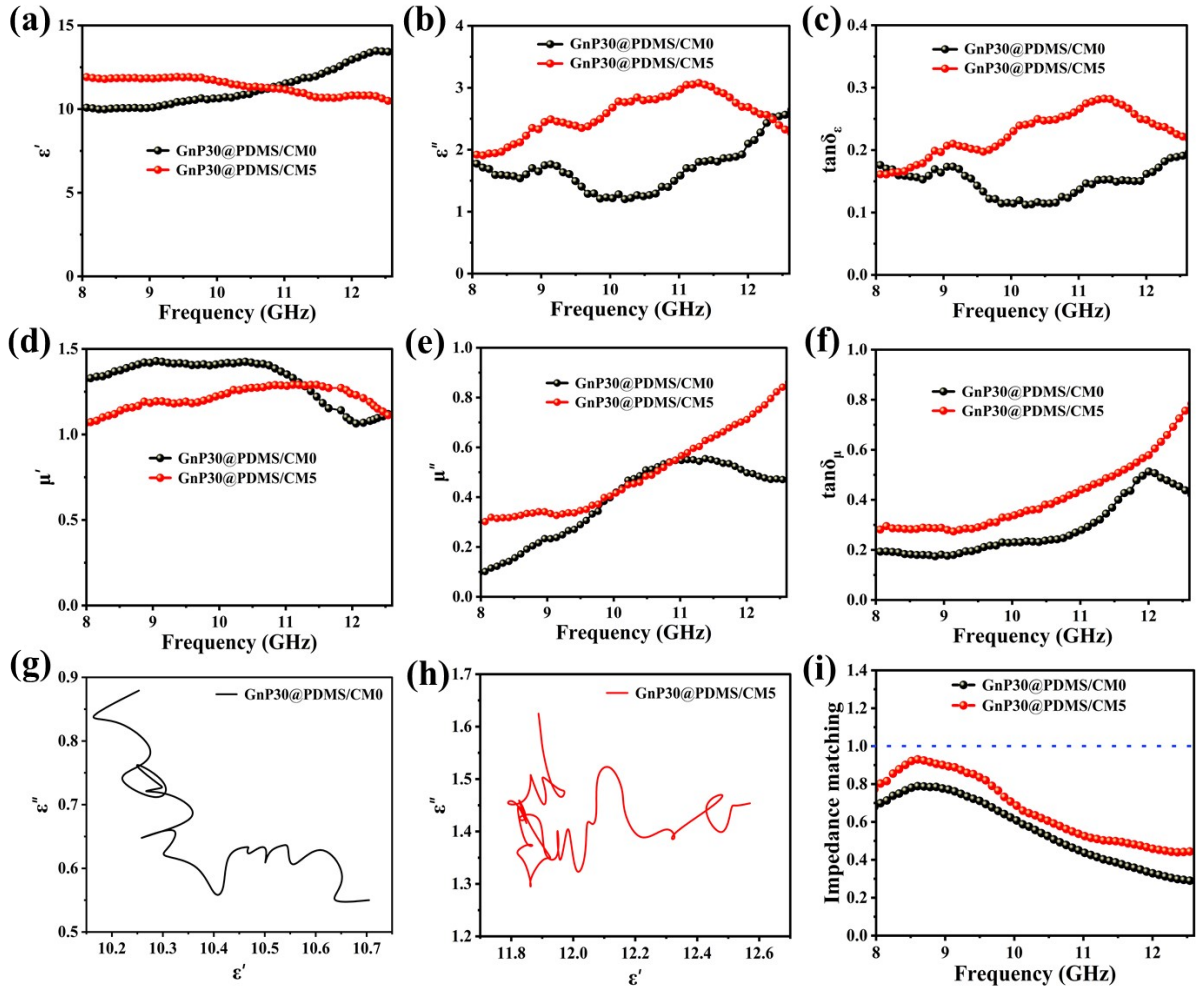

**Fig. S10.** Frequency-dependent electromagnetic parameters of GnP30@PDMS/CM composites. (a)  $\epsilon'$ , (b)  $\epsilon''$ , and (c)  $\tan\delta_\epsilon$ . (d)  $\mu'$ , (e)  $\mu''$ , and (f)  $\tan\delta_\mu$ . (g, h) Cole–Cole plots for GnP30@PDMS/CM0 and GnP30@PDMS/CM5, respectively. (i) Normalized input impedance ( $|Z_{in}/Z_0|$ ) as a function of frequency.

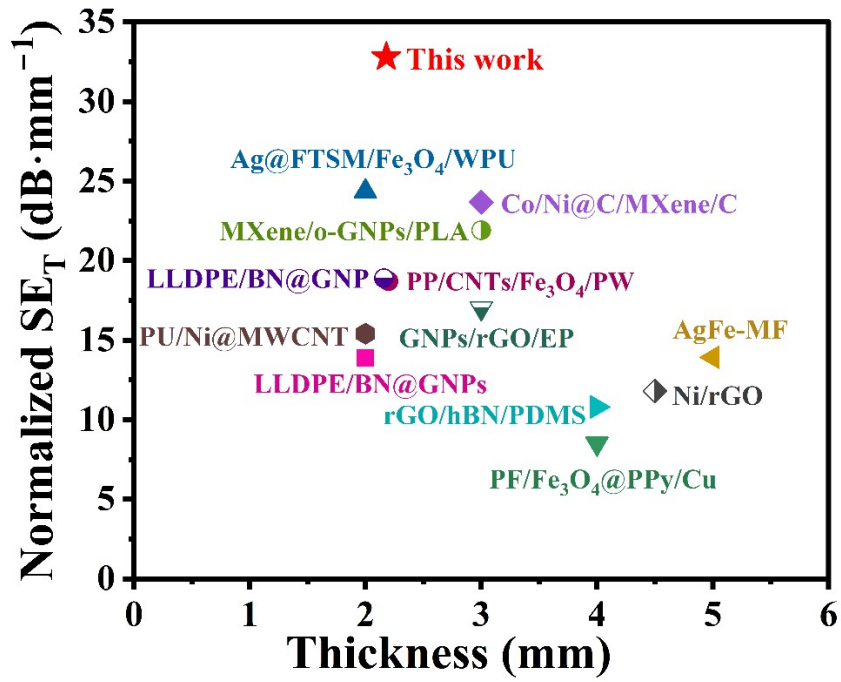

**Fig. S11.** Comparison of normalized  $SE_T$  versus thickness for the GnP30@PDMS/CM5 composite with 3D dual network structures and other reported 3D polymer composites.

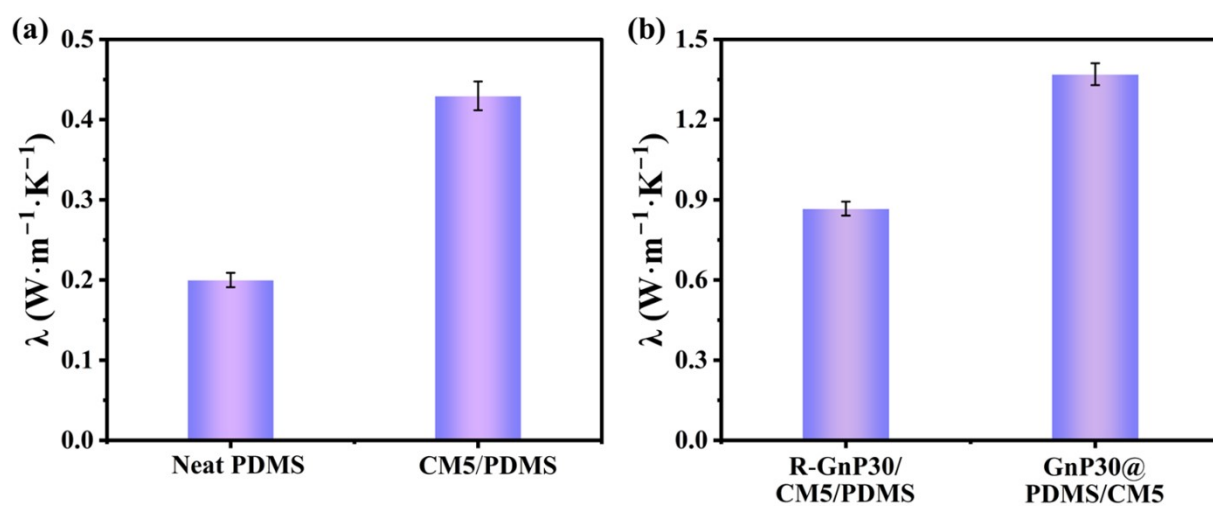

**Fig. S12.** Comparison of thermal conductivity of (a) neat PDMS and 5wt% CM/PDMS composites. (b) Random R-GnP30/CM5/PDMS composites and 3D dual GnP30@PDMS/CM5 composites. Error bars represent standard deviation (n = 3).

**Table S1.** Compositional analysis of GnP30@PDMS foams and GnP30@PDMS/CM composites with GnP and Co/Ni@C nanoparticles.

| <b>Materials</b> | <b>GnP content in GnP30@PDMS foams (wt%)</b> | <b>GnP content in GnP30@PDMS/CM composites (wt%)</b> | <b>Co/Ni@C content in GnP30@PDMS/CM composites (wt%)</b> |
|------------------|----------------------------------------------|------------------------------------------------------|----------------------------------------------------------|
| GnP30@PDMS/CM0   |                                              | 15.85                                                | -                                                        |
| GnP30@PDMS/CM3   | 30                                           | 15.97                                                | 2.25                                                     |
| GnP30@PDMS/CM5   |                                              | 16.06                                                | 3.70                                                     |
| GnP30@PDMS/CM8   |                                              | 16.25                                                | 5.98                                                     |

**Table S2.** Detailed comparison of EMI shielding performance of our prepared 3D dual GnP30@PDMS/CM composites with other reported 3D dual structure-based composite materials.

| Materials                                   | Thickness (mm) | EMI SE (dB) | Normalized SE (dB·mm <sup>-1</sup> ) | Absorption coefficient (A) | Year and references |
|---------------------------------------------|----------------|-------------|--------------------------------------|----------------------------|---------------------|
| LLDPE/BN@GNP                                | 2              | 27.8        | 13.9                                 | ~0.48                      | 2023 <sup>1</sup>   |
| PP/CNTs/Fe <sub>3</sub> O <sub>4</sub> /PW  | 2.2            | 39.2        | 17.8                                 | ~0.21                      | 2022 <sup>2</sup>   |
| Ag@FTSM/Fe <sub>3</sub> O <sub>4</sub> /WPU | 2              | 48.7        | 24.35                                | 0.60                       | 2024 <sup>3</sup>   |
| PF/Fe <sub>3</sub> O <sub>4</sub> @PPy/Cu   | 4              | 32.2        | 8.05                                 | 0.60                       | 2024 <sup>4</sup>   |
| Co/Ni@C/MXene/cellulose-derived carbon      | 3              | 70.4        | 23.67                                | 0.54                       | 2025 <sup>5</sup>   |
| PCL/BN@PLA/CNTs                             | 3              | 31.4        | 10.5                                 | ~0.3                       | 2024 <sup>6</sup>   |
| rGO/hBN/PDMS                                | 4              | 43.1        | 10.8                                 | 0.34                       | 2023 <sup>7</sup>   |
| PU/Ni@MWCNTs                                | 2              | 30.8        | 15.40                                | -                          | 2020 <sup>8</sup>   |
| GNPs/rGO/EP                                 | 3              | 51          | 17                                   | ~0.14                      | 2019 <sup>9</sup>   |
| Graphene/CNT/PEN                            | 2              | 25.8        | 16.1                                 | -                          | 2023 <sup>10</sup>  |
| rGF/rGM/PDMS                                | 2.2            | 38.75       | 17.61                                | ~0.47                      | 2023 <sup>11</sup>  |
| MXene@rGO/PI                                | 5              | 58.7        | 11.74                                | ~0.19                      | 2024 <sup>12</sup>  |
| PDMS/GNPs@LM                                | 2.16           | 40.8        | 18.89                                | ~0.3                       | 2024 <sup>13</sup>  |
| MXene/o-GNPs/PLA                            | 3              | 65          | 21.9                                 | -                          | 2022 <sup>14</sup>  |
| PVA/PAA@PEGDMA/PEDOT:PSS                    | 4              | 40.61       | 10.15                                | 0.36                       | 2025 <sup>15</sup>  |
| GnP30@PDMS/CM5                              | 2.18           | 71.5        | 32.8                                 | 0.69                       | <b>This work</b>    |

**Abbreviation:** LLDPE: Linear low-density polyethylene; BN: Boron nitride; Fe<sub>3</sub>O<sub>4</sub>: Iron oxide; PP: Polypropylene; FTSM: Foamed temperature-sensitive microspheres; CNT: Carbon nanotubes; PW: Paraffin wax; WPU: Waterborne polyurethane; PF: Polyimide foams; PPy: Polypyrrole; PCL: Polycaprolactone; rGO: Reduced graphene oxide; PDMS: PU: Polyurethane; MWCNTs: Multi-walled carbon nanotubes; PEN: Poly(aryl ether nitrile); rGF: rGO and Fe<sub>3</sub>O<sub>4</sub>; rGM: rGO and Fe<sub>3</sub>O<sub>4</sub>; LM: Liquid metal; o-GNPs: Ordered GNPs; PLA: Polylactic acid; PVA: Polyvinyl alcohol; PPA: Polyacrylic acid; PEGDMA: Polyethylene glycol dimethacrylate; PEDOT:PSS: Poly (3,4-ethylenedioxythiophene) polystyrene sulfonate).

**Note:** “~” indicates approximate values estimated from the corresponding figures in the cited references.

**Table S3.** Detailed comparison of through-plane thermal conductivity values in our prepared 3D dual GnP30@PDMS/CM5 composites with other reported 3D dual structure-based composite materials.

| Materials                                  | Filler content (wt%) | Thermal conductivity ( $\text{W}\cdot\text{m}^{-1}\cdot\text{K}^{-1}$ ) | TCE (%) | Year and references |
|--------------------------------------------|----------------------|-------------------------------------------------------------------------|---------|---------------------|
| AlN/BN/EP                                  | 50                   | 1.29                                                                    | 614     | 2021 <sup>16</sup>  |
| BN@CNTs/EP                                 | 30                   | 1.20                                                                    | 500     | 2020 <sup>17</sup>  |
| PP/CNTs/Fe <sub>3</sub> O <sub>4</sub> /PW | 10.6                 | 0.59                                                                    | 211     | 2022 <sup>2</sup>   |
| CuNWs-TAGA/EP                              | 7.2                  | 0.71                                                                    | 132     | 2022 <sup>18</sup>  |
| EP/BN-PVDF                                 | 21                   | 1.22                                                                    | 618     | 2020 <sup>19</sup>  |
| TiO <sub>2</sub> @C-Ni/CNTs/NR             | 3                    | 0.25                                                                    | 136     | 2022 <sup>20</sup>  |
| PP/CNTs/Fe <sub>3</sub> O <sub>4</sub> /PW | 20                   | 0.59                                                                    | 210     | 2022 <sup>2</sup>   |
| PDMS/Ag-BN/rGO                             | 32                   | 1.2                                                                     | 488     | 2021 <sup>21</sup>  |
| PU/GF/MAPP                                 | 40                   | 0.58                                                                    | 82.8    | 2022 <sup>22</sup>  |
| rGO/hBN/PDMS                               | 30                   | 1.27                                                                    | 567     | 2023 <sup>7</sup>   |
| PVDF@MWCNT/BN                              | 55                   | 0.83                                                                    | -       | 2019 <sup>23</sup>  |
| CMC@CNT-PPy/PW                             | 19.1                 | 0.64                                                                    | 156     | 2023 <sup>24</sup>  |
| C-MG-paraffin                              | 15.1                 | 0.88                                                                    | 300     | 2021 <sup>25</sup>  |
| GnP30@PDMS/CM5                             | 19.76                | 1.37                                                                    | 585     | <b>This work</b>    |

**Abbreviation:** AlN: Aluminum nitride; BN: Boron nitride; EP: Epoxy; CNT: Carbon nanotubes; PP: Polypropylene; Fe<sub>3</sub>O<sub>4</sub>: Iron oxide; PW: Paraffin wax; TAGA: Thermally annealed graphene aerogel; GNPs: Graphene nanoplatelets; PVDF: Poly (vinylidene fluoride); PDMS: Poly(dimethylsiloxane); MWCNTs: Multi-walled carbon nanotubes; MAPP: Ammonium polyphosphate wrapped MXene; CMC, Carboxymethyl cellulose, MG: Multilayer graphene.

## References

- 1 Z. Peng, Q. Lv, J. Jing, H. Pei, Y. Chen and E. Ivanov, *Compos. Part B Eng.*, 2023, **251**, 110491.
- 2 X. Li, M. Sheng, S. Gong, H. Wu, X. Chen, X. Lu and J. Qu, *Chem. Eng. J.*, 2022, **430**, 132928.
- 3 M. Ma, X. Liang, W. Tao, Q. Peng, W. Shao, S. Chen, Y. Shi, H. He, Y. Zhu and X. Wang, *Compos. Struct.*, 2024, **342**, 118259.
- 4 W. Chu, J. Li, J. Lin, W. Li, J. Xin, F. Liu, X. He, Z. Ma and Q. Zhao, *Compos. Sci. Technol.*, 2024, **249**, 110489.
- 5 F. Ren, L. Ma, C. Li, T. Wu, J. Zhang, L. Pei, Y. Jin, Z. Sun, Z. Guo, P. Song and P. Ren, *Carbohydr. Polym.*, 2025, **356**, 123369.
- 6 T. Liu, H. Feng, L. Deng, C. Jin, H. Vahabi, M. R. Saeb and T. Kuang, *Nanoscale*, 2024, **16**, 21048–21060.
- 7 Y. Yang, R. Bi, W. Ren, Y. Sun, H. Zhao and H. Duan, *Compos. Sci. Technol.*, 2023, **243**, 110259.
- 8 G. Sang, P. Xu, C. Liu, P. Wang, X. Hu and Y. Ding, *Ind. Eng. Chem. Res.*, 2020, **59**, 15233–15241.
- 9 C. Liang, H. Qiu, Y. Han, H. Gu, P. Song, L. Wang, J. Kong, D. Cao and J. Gu, *J. Mater. Chem. C*, 2019, **7**, 2725–2733.
- 10 S. Zhang, J. Ye and X. Liu, *Colloids Surf. Physicochem. Eng. Asp.*, 2023, **656**, 130414.
- 11 X. Pei, G. Liu, H. Shi, R. Yu, S. Wang, S. Liu, C. Min, J. Song, R. Shao and Z. Xu, *Compos. Sci. Technol.*, 2023, **233**, 109909.
- 12 P. Zhang, H. Li, H. Liang, H. Wang, C. Yang, X. Shan, Q. Zhang and Y. Chen, *Mater. Today Commun.*, 2024, **38**, 108506.
- 13 Y. Zhang, S. Yang, Y. Liu, T. Gu and F. Liu, *J. Mater. Chem. A*, 2024, **12**, 27527–27539.
- 14 T.-B. Ma, H. Ma, K.-P. Ruan, X.-T. Shi, H. Qiu, S.-Y. Gao and J.-W. Gu, *Chin. J. Polym. Sci.*, 2022, **40**, 248–255.
- 15 Z. Zhang, G. Liu, J. Wu, X. Jiang, H. Liu and Z. Li, *Chem. Eng. J.*, 2025, **519**, 165710.
- 16 J. Lee and J. Kim, *Compos. Commun.*, 2021, **28**, 100935.
- 17 D.-L. Zhang, S.-N. Liu, H.-W. Cai, Q.-K. Feng, S.-L. Zhong, J.-W. Zha and Z.-M. Dang, *J. Materiomics*, 2020, **6**, 751–759.
- 18 X. Yang, S. Fan, Y. Li, Y. Guo, Y. Li, K. Ruan, S. Zhang, J. Zhang, J. Kong and J. Gu, *Compos. Part Appl. Sci. Manuf.*, 2020, **128**, 105670.

- 19X. Chen, J. S. K. Lim, W. Yan, F. Guo, Y. N. Liang, H. Chen, A. Lambourne and X. Hu, *ACS Appl. Mater. Interfaces*, 2020, **12**, 16987–16996.
- 20L. Wu, X. Liu, G. Wan, X. Peng, Z. He, S. Shi and G. Wang, *Chem. Eng. J.*, 2022, **448**, 137600.
- 21W. Lee and J. Kim, *Polym. Test.*, 2021, **104**, 107402.
- 22P. Jia, Y. Zhu, J. Lu, B. Wang, L. Song, B. Wang and Y. Hu, *Chem. Eng. J.*, 2022, **439**, 135673.
- 23P. Zhang, X. Ding, Y. Wang, Y. Gong, K. Zheng, L. Chen, X. Tian and X. Zhang, *Compos. Part Appl. Sci. Manuf.*, 2019, **117**, 56–64.
- 24Z. Tao, H. Zou, M. Li, S. Ren, J. Xu, J. Lin, M. Yang, Y. Feng and G. Wang, *J. Colloid Interface Sci.*, 2023, **629**, 632–643.
- 25Z. Huang, C. Wang, L. Zhou and C. Wu, *Surf. Interfaces*, 2021, **26**, 101338.
